# Supplementary material for: An extremely uniform dispersion of MWCNTs in olefin block copolymers significantly enhances electrical and mechanical performances
Source: Royal Society of Chemistry journal article supplement (doi:10.1039/c5py01236h), 2015-01-01
Supplement: c5py01236h1.pdf [file c5py01236h1.pdf]

**Extremely uniform dispersion of MWCNTs in olefin block copolymer significantly enhances electrical and mechanical performance**

*Ting Li, Jun-Hong Pu, Li-Feng Ma, Rui-Ying Bao, Guo-Qiang Qi, Wei Yang,\* Bang-Hu Xie, and Ming-Bo Yang*

College of Polymer Science and Engineering, Sichuan University, State Key Laboratory of Polymer Materials Engineering, Chengdu, 610065 Sichuan, China

**Electronic supplementary information**

**Table S1** Sample informations of ORC<sup>a</sup> and OBC<sup>b</sup>.

| Properties | Density (g.cm <sup>-3</sup> ) | Mw (g.mol <sup>-1</sup> ) | Mw/Mn | Tg (°C) |
|------------|-------------------------------|---------------------------|-------|---------|
| ORC 8150   | 0.868                         | 162,700                   | 2.1   | -42.9   |
| OBC 9500   | 0.878                         | 82, 600                   | 2.3   | -45     |

a. provided by Bartczak et al.<sup>1</sup> and Mäder et al.<sup>2</sup>.

b. provided by Wu et al.<sup>3</sup>.

It is worth mentioning that the use of surface energies of ORCs in previous researches is relatively arbitrary without considering the octene content. For instance, the octene content of Engage 8130 and Engage 8200 is 42 wt.%<sup>4,5</sup> and 24 wt.%<sup>6,7</sup>, respectively. Engage 8130 was utilized by M. Bailly et al.<sup>8</sup> while surface energies of Engage 8200 were considered during the calculation in their work. This may be because although the octene content in ORCs is different, the surface energies of the copolymers are close enough. To prove this point, surface energies of ORCs with different octene content were calculated by Synthia module of Material Studio. Nevertheless, the results octane shows the content of octane has little effect on the surface energies of ORCs. Therefore, it is reasonable to use the surface energies of ORC with 39 wt.% octene content to describe the ethylene- $\alpha$ -octene-rich domains of ORC and OBC during our calculation.

**Table S2** Surface tensions of random ethylene-octene copolymers of different octane content.

| Monomer 1 | wt.% 1 | Monomer 2 | wt.% 2 | T (K) | Molecular weight | Surface tension (molar parachor) (Synthia) | Surface tension (Fedors) at 298K (Synthia) | Surface tension (van Krevelen) at 298K (Synthia) |
|-----------|--------|-----------|--------|-------|------------------|--------------------------------------------|--------------------------------------------|--------------------------------------------------|
| octane    | 0.01   | ethylene  | 0.99   | 463   | 1.63E+05         | 20.17139                                   | 34.16169                                   | 32.27214                                         |
| octane    | 0.02   | ethylene  | 0.98   | 463   | 1.63E+05         | 20.17733                                   | 34.17056                                   | 32.28339                                         |
| octane    | 0.03   | ethylene  | 0.97   | 463   | 1.63E+05         | 20.18328                                   | 34.17943                                   | 32.29466                                         |
| octane    | 0.04   | ethylene  | 0.96   | 463   | 1.63E+05         | 20.18924                                   | 34.18831                                   | 32.30592                                         |

---

|        |      |          |      |     |          |          |          |          |
|--------|------|----------|------|-----|----------|----------|----------|----------|
| octane | 0.05 | ethylene | 0.95 | 463 | 1.63E+05 | 20.1952  | 34.1972  | 32.3172  |
| octane | 0.06 | ethylene | 0.94 | 463 | 1.63E+05 | 20.20117 | 34.20609 | 32.32848 |
| octane | 0.07 | ethylene | 0.93 | 463 | 1.63E+05 | 20.20715 | 34.21498 | 32.33977 |
| octane | 0.08 | ethylene | 0.92 | 463 | 1.63E+05 | 20.21313 | 34.22388 | 32.35106 |
| octane | 0.09 | ethylene | 0.91 | 463 | 1.63E+05 | 20.21912 | 34.23279 | 32.36237 |
| octane | 0.1  | ethylene | 0.9  | 463 | 1.63E+05 | 20.22512 | 34.2417  | 32.37367 |
| octane | 0.11 | ethylene | 0.89 | 463 | 1.63E+05 | 20.23112 | 34.25062 | 32.38499 |
| octane | 0.12 | ethylene | 0.88 | 463 | 1.63E+05 | 20.23713 | 34.25955 | 32.39631 |
| octane | 0.13 | ethylene | 0.87 | 463 | 1.63E+05 | 20.24315 | 34.26848 | 32.40764 |
| octane | 0.14 | ethylene | 0.86 | 463 | 1.63E+05 | 20.24918 | 34.27741 | 32.41897 |
| octane | 0.15 | ethylene | 0.85 | 463 | 1.63E+05 | 20.25521 | 34.28635 | 32.43031 |
| octane | 0.16 | ethylene | 0.84 | 463 | 1.63E+05 | 20.26124 | 34.2953  | 32.44166 |
| octane | 0.17 | ethylene | 0.83 | 463 | 1.63E+05 | 20.26729 | 34.30425 | 32.45302 |
| octane | 0.18 | ethylene | 0.82 | 463 | 1.63E+05 | 20.27334 | 34.31321 | 32.46438 |
| octane | 0.19 | ethylene | 0.81 | 463 | 1.63E+05 | 20.2794  | 34.32217 | 32.47575 |
| octane | 0.2  | ethylene | 0.8  | 463 | 1.63E+05 | 20.28546 | 34.33114 | 32.48712 |
| octane | 0.21 | ethylene | 0.79 | 463 | 1.63E+05 | 20.29154 | 34.34012 | 32.4985  |
| octane | 0.22 | ethylene | 0.78 | 463 | 1.63E+05 | 20.29761 | 34.3491  | 32.50989 |
| octane | 0.23 | ethylene | 0.77 | 463 | 1.63E+05 | 20.3037  | 34.35809 | 32.52129 |
| octane | 0.24 | ethylene | 0.76 | 463 | 1.63E+05 | 20.30979 | 34.36708 | 32.53269 |
| octane | 0.25 | ethylene | 0.75 | 463 | 1.63E+05 | 20.31589 | 34.37608 | 32.5441  |
| octane | 0.26 | ethylene | 0.74 | 463 | 1.63E+05 | 20.322   | 34.38508 | 32.55551 |
| octane | 0.27 | ethylene | 0.73 | 463 | 1.63E+05 | 20.32811 | 34.39409 | 32.56693 |
| octane | 0.28 | ethylene | 0.72 | 463 | 1.63E+05 | 20.33423 | 34.40311 | 32.57836 |
| octane | 0.29 | ethylene | 0.71 | 463 | 1.63E+05 | 20.34035 | 34.41213 | 32.5898  |
| octane | 0.3  | ethylene | 0.7  | 463 | 1.63E+05 | 20.34648 | 34.42115 | 32.60124 |
| octane | 0.31 | ethylene | 0.69 | 463 | 1.63E+05 | 20.35262 | 34.43019 | 32.61269 |
| octane | 0.32 | ethylene | 0.68 | 463 | 1.63E+05 | 20.35877 | 34.43922 | 32.62415 |
| octane | 0.33 | ethylene | 0.67 | 463 | 1.63E+05 | 20.36492 | 34.44827 | 32.63561 |
| octane | 0.34 | ethylene | 0.66 | 463 | 1.63E+05 | 20.37108 | 34.45732 | 32.64708 |
| octane | 0.35 | ethylene | 0.65 | 463 | 1.63E+05 | 20.37724 | 34.46637 | 32.65855 |
| octane | 0.36 | ethylene | 0.64 | 463 | 1.63E+05 | 20.38342 | 34.47543 | 32.67004 |
| octane | 0.37 | ethylene | 0.63 | 463 | 1.63E+05 | 20.3896  | 34.4845  | 32.68153 |
| octane | 0.38 | ethylene | 0.62 | 463 | 1.63E+05 | 20.39578 | 34.49357 | 32.69302 |
| octane | 0.39 | ethylene | 0.61 | 463 | 1.63E+05 | 20.40197 | 34.50265 | 32.70453 |
| octane | 0.4  | ethylene | 0.6  | 463 | 1.63E+05 | 20.40817 | 34.51174 | 32.71604 |
| octane | 0.41 | ethylene | 0.59 | 463 | 1.63E+05 | 20.41437 | 34.52083 | 32.72756 |
| octane | 0.42 | ethylene | 0.58 | 463 | 1.63E+05 | 20.42058 | 34.52992 | 32.73908 |
| octane | 0.43 | ethylene | 0.57 | 463 | 1.63E+05 | 20.4268  | 34.53903 | 32.75061 |
| octane | 0.44 | ethylene | 0.56 | 463 | 1.63E+05 | 20.43303 | 34.54813 | 32.76215 |
| octane | 0.45 | ethylene | 0.55 | 463 | 1.63E+05 | 20.43926 | 34.55725 | 32.77369 |
| octane | 0.46 | ethylene | 0.54 | 463 | 1.63E+05 | 20.44549 | 34.56637 | 32.78525 |
| octane | 0.47 | ethylene | 0.53 | 463 | 1.63E+05 | 20.45173 | 34.57549 | 32.7968  |
| octane | 0.48 | ethylene | 0.52 | 463 | 1.63E+05 | 20.45798 | 34.58462 | 32.80837 |

---

---

|        |      |          |      |     |          |          |          |          |
|--------|------|----------|------|-----|----------|----------|----------|----------|
| octane | 0.49 | ethylene | 0.51 | 463 | 1.63E+05 | 20.46424 | 34.59376 | 32.81994 |
| octane | 0.5  | ethylene | 0.5  | 463 | 1.63E+05 | 20.4705  | 34.6029  | 32.83152 |
| octane | 0.51 | ethylene | 0.49 | 463 | 1.63E+05 | 20.47677 | 34.61205 | 32.84311 |
| octane | 0.52 | ethylene | 0.48 | 463 | 1.63E+05 | 20.48304 | 34.62121 | 32.8547  |
| octane | 0.53 | ethylene | 0.47 | 463 | 1.63E+05 | 20.48932 | 34.63037 | 32.8663  |
| octane | 0.54 | ethylene | 0.46 | 463 | 1.63E+05 | 20.4956  | 34.63953 | 32.87791 |
| octane | 0.55 | ethylene | 0.45 | 463 | 1.63E+05 | 20.50189 | 34.6487  | 32.88952 |
| octane | 0.56 | ethylene | 0.44 | 463 | 1.63E+05 | 20.50819 | 34.65788 | 32.90114 |
| octane | 0.57 | ethylene | 0.43 | 463 | 1.63E+05 | 20.51449 | 34.66707 | 32.91277 |
| octane | 0.58 | ethylene | 0.42 | 463 | 1.63E+05 | 20.5208  | 34.67626 | 32.92441 |
| octane | 0.59 | ethylene | 0.41 | 463 | 1.63E+05 | 20.52712 | 34.68545 | 32.93605 |
| octane | 0.6  | ethylene | 0.4  | 463 | 1.63E+05 | 20.53343 | 34.69465 | 32.9477  |
| octane | 0.61 | ethylene | 0.39 | 463 | 1.63E+05 | 20.53976 | 34.70386 | 32.95935 |
| octane | 0.62 | ethylene | 0.38 | 463 | 1.63E+05 | 20.54609 | 34.71308 | 32.97101 |
| octane | 0.63 | ethylene | 0.37 | 463 | 1.63E+05 | 20.55242 | 34.7223  | 32.98268 |
| octane | 0.64 | ethylene | 0.36 | 463 | 1.63E+05 | 20.55876 | 34.73152 | 32.99436 |
| octane | 0.65 | ethylene | 0.35 | 463 | 1.63E+05 | 20.56511 | 34.74075 | 33.00605 |
| octane | 0.66 | ethylene | 0.34 | 463 | 1.63E+05 | 20.57146 | 34.74999 | 33.01774 |
| octane | 0.67 | ethylene | 0.33 | 463 | 1.63E+05 | 20.57782 | 34.75923 | 33.02943 |
| octane | 0.68 | ethylene | 0.32 | 463 | 1.63E+05 | 20.58418 | 34.76848 | 33.04114 |
| octane | 0.69 | ethylene | 0.31 | 463 | 1.63E+05 | 20.59054 | 34.77774 | 33.05285 |
| octane | 0.7  | ethylene | 0.3  | 463 | 1.63E+05 | 20.59691 | 34.787   | 33.06457 |
| octane | 0.71 | ethylene | 0.29 | 463 | 1.63E+05 | 20.60328 | 34.79627 | 33.0763  |
| octane | 0.72 | ethylene | 0.28 | 463 | 1.63E+05 | 20.60966 | 34.80554 | 33.08803 |
| octane | 0.73 | ethylene | 0.27 | 463 | 1.63E+05 | 20.61604 | 34.81482 | 33.09977 |
| octane | 0.74 | ethylene | 0.26 | 463 | 1.63E+05 | 20.62242 | 34.82411 | 33.11152 |
| octane | 0.75 | ethylene | 0.25 | 463 | 1.63E+05 | 20.62881 | 34.8334  | 33.12327 |
| octane | 0.76 | ethylene | 0.24 | 463 | 1.63E+05 | 20.6352  | 34.84269 | 33.13503 |
| octane | 0.77 | ethylene | 0.23 | 463 | 1.63E+05 | 20.6416  | 34.852   | 33.1468  |
| octane | 0.78 | ethylene | 0.22 | 463 | 1.63E+05 | 20.64799 | 34.86131 | 33.15858 |
| octane | 0.79 | ethylene | 0.21 | 463 | 1.63E+05 | 20.65439 | 34.87062 | 33.17036 |
| octane | 0.8  | ethylene | 0.2  | 463 | 1.63E+05 | 20.66079 | 34.87994 | 33.18215 |
| octane | 0.81 | ethylene | 0.19 | 463 | 1.63E+05 | 20.6672  | 34.88927 | 33.19395 |
| octane | 0.82 | ethylene | 0.18 | 463 | 1.63E+05 | 20.6736  | 34.89861 | 33.20575 |
| octane | 0.83 | ethylene | 0.17 | 463 | 1.63E+05 | 20.68001 | 34.90795 | 33.21756 |
| octane | 0.84 | ethylene | 0.16 | 463 | 1.63E+05 | 20.68641 | 34.91729 | 33.22938 |
| octane | 0.85 | ethylene | 0.15 | 463 | 1.63E+05 | 20.69282 | 34.92664 | 33.24121 |
| octane | 0.86 | ethylene | 0.14 | 463 | 1.63E+05 | 20.69923 | 34.936   | 33.25304 |
| octane | 0.87 | ethylene | 0.13 | 463 | 1.63E+05 | 20.70563 | 34.94537 | 33.26488 |
| octane | 0.88 | ethylene | 0.12 | 463 | 1.63E+05 | 20.71204 | 34.95474 | 33.27673 |
| octane | 0.89 | ethylene | 0.11 | 463 | 1.63E+05 | 20.71844 | 34.96411 | 33.28858 |
| octane | 0.9  | ethylene | 0.1  | 463 | 1.63E+05 | 20.72484 | 34.97349 | 33.30045 |
| octane | 0.91 | ethylene | 0.09 | 463 | 1.63E+05 | 20.73123 | 34.98288 | 33.31232 |
| octane | 0.92 | ethylene | 0.08 | 463 | 1.63E+05 | 20.73763 | 34.99228 | 33.32419 |

---

|        |      |          |      |     |          |          |          |          |
|--------|------|----------|------|-----|----------|----------|----------|----------|
| octane | 0.93 | ethylene | 0.07 | 463 | 1.63E+05 | 20.74401 | 35.00168 | 33.33608 |
| octane | 0.94 | ethylene | 0.06 | 463 | 1.63E+05 | 20.75039 | 35.01109 | 33.34797 |
| octane | 0.95 | ethylene | 0.05 | 463 | 1.63E+05 | 20.75677 | 35.0205  | 33.35986 |
| octane | 0.96 | ethylene | 0.04 | 463 | 1.63E+05 | 20.76313 | 35.02992 | 33.37177 |
| octane | 0.97 | ethylene | 0.03 | 463 | 1.63E+05 | 20.76949 | 35.03934 | 33.38368 |
| octane | 0.98 | ethylene | 0.02 | 463 | 1.63E+05 | 20.77583 | 35.04877 | 33.3956  |
| octane | 0.99 | ethylene | 0.01 | 463 | 1.63E+05 | 20.78216 | 35.05821 | 33.40753 |

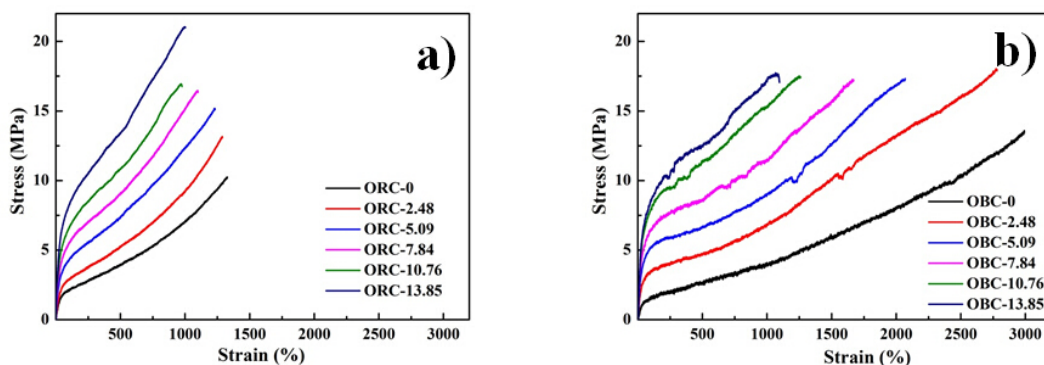

**Fig. S1** The representative uniaxial tensile stress-strain curves of (a) ORC composites, (b) OBC composites.

## References

- 1 Z. Bartczak, A. Argon, R. Cohen and M. Weinberg, *Polymer*, 1999, 40, 2331-2346.
- 2 D. Mäder, M. Bruch, R.-D. Maier, F. Stricker and R. Mülhaupt, *Macromolecules*, 1999, 32, 1252-1259.
- 3 S. Wu, H. Li, G. Huang and J. Wu, *RSC Advances*, 2014, 4, 19024-19033.
- 4 O. Osazuwa, K. Petrie, M. Kontopoulou, P. Xiang, Z. Ye and A. Docoslis, *Composites Science and Technology*, 2012, 73, 27-33.

5 M. Dondero, J. M. Pastor, J. M. Carella and C. J. Perez, *Polymer Engineering and Science*, 2009, 49, 1886.

6 C. Ma, M. Zhang and M. Rong, *Journal of applied polymer science*, 2007, 103, 1578-1584.

7 L. Yin, D. Shi, Y. Liu and J. Yin, *Polymer International*, 2009, 58, 919-926.

8 M. Bailly and M. Kontopoulou, *Polymer*, 2009, 50, 2472-2480.
